# Supplementary material
Source: MDPI journal article supplement (https://www.mdpi.com/2071-1050/14/21/14160)
Supplement: s1 [file s1 › sustainability-1971618-supplementary.pdf]

## Supplementary Materials

**Table S1.** Key revitalisation projects in the studied towns viewed against the Cittàslow criteria.

| Town    | Programme name                                                                        | Key projects                                                                                                                       | energy and<br>environmental policy | infrastructure policy | urban quality policy | agricultural, crafts and<br>tourism policies | policy of hospitality,<br>education and | social integration | partnership |
|---------|---------------------------------------------------------------------------------------|------------------------------------------------------------------------------------------------------------------------------------|------------------------------------|-----------------------|----------------------|----------------------------------------------|-----------------------------------------|--------------------|-------------|
| Bełżyce | Local<br>Revitalisation<br>Programme<br>for the centre of<br>Bełżyce<br>for 2017–2023 | 1. Revitalisation of the building, squares, pavements and green areas of the Wojciech Oczko, MD County Hospital in Bełżyce         |                                    | x                     | x                    |                                              |                                         |                    |             |
|         |                                                                                       | 2. Preservation of cultural heritage                                                                                               |                                    |                       | x                    | x                                            |                                         |                    |             |
|         |                                                                                       | 3. Reconstruction of streets in the city centre                                                                                    |                                    | x                     | x                    |                                              |                                         |                    |             |
|         |                                                                                       | 4. Implementation of projects in the field of environmental education of children and youth                                        |                                    |                       |                      |                                              | x                                       |                    |             |
|         |                                                                                       | 5. Revalorisation of the urban layout of the market frontage                                                                       |                                    |                       | x                    |                                              |                                         |                    |             |
|         |                                                                                       | 6. Creation of the Summer Open-Air Cinema                                                                                          |                                    |                       |                      |                                              | x                                       | x                  |             |
|         |                                                                                       | 7. Creation of security zones                                                                                                      |                                    |                       | x                    |                                              |                                         |                    |             |
|         |                                                                                       | 8. Arrangement of walking and cycling paths, and educational paths                                                                 |                                    | x                     |                      |                                              |                                         |                    |             |
|         |                                                                                       | 9. Renovation and modernisation of the sports and recreational facilities of the Centre for Physical Culture and Sports in Bełżyce |                                    | x                     |                      |                                              |                                         |                    |             |
|         |                                                                                       | 10. Arrangement of a town marketplace and a car park with accompanying infrastructure                                              |                                    | x                     |                      | x                                            |                                         |                    |             |
|         |                                                                                       | 11. Creating a show-piece public space in the centre of Bełżyce for cultural and recreational purposes                             |                                    |                       | x                    |                                              |                                         |                    |             |

|                           |                                                                                                                     |                                                                                                                                                                                                                                                                        |   |   |   |   |   |   |   |
|---------------------------|---------------------------------------------------------------------------------------------------------------------|------------------------------------------------------------------------------------------------------------------------------------------------------------------------------------------------------------------------------------------------------------------------|---|---|---|---|---|---|---|
|                           |                                                                                                                     | 12. Arrangement of active and passive rest areas, garden squares and green areas                                                                                                                                                                                       |   | x | x |   |   |   |   |
|                           |                                                                                                                     | 13. Organisation of the Hieronim Dekutowski "Zapora" Rally                                                                                                                                                                                                             |   |   |   | x |   |   |   |
|                           |                                                                                                                     | 14. Construction of a public toilet                                                                                                                                                                                                                                    |   | x |   |   |   |   |   |
|                           |                                                                                                                     | 15. Patient days – open days with doctors                                                                                                                                                                                                                              |   | x |   |   |   |   |   |
|                           |                                                                                                                     | 16. Family festival in Bełżyce                                                                                                                                                                                                                                         |   |   |   | x |   | x |   |
|                           |                                                                                                                     | 17. Holiday screenings of children's programmes                                                                                                                                                                                                                        |   |   |   | x |   | x |   |
|                           |                                                                                                                     | 18. Road safety classes for young people and children                                                                                                                                                                                                                  |   |   |   |   | x |   |   |
|                           |                                                                                                                     | 19. Sports activities for residents – football, volleyball, outdoor fitness, etc.                                                                                                                                                                                      |   |   |   |   |   | x |   |
|                           |                                                                                                                     | 20. The Little Jagiellonian Fair in Bełżyce                                                                                                                                                                                                                            |   |   |   | x |   |   |   |
|                           |                                                                                                                     | 21. Children's Day                                                                                                                                                                                                                                                     |   |   |   | x |   |   |   |
|                           |                                                                                                                     | 22. Family assistance                                                                                                                                                                                                                                                  |   | x |   |   |   |   |   |
|                           |                                                                                                                     | 23. Volunteering "Children's day care centre"                                                                                                                                                                                                                          |   |   |   |   |   | x |   |
|                           |                                                                                                                     | 24. Active Senior citizen                                                                                                                                                                                                                                              |   |   |   |   |   | x |   |
|                           |                                                                                                                     | <b>Total</b>                                                                                                                                                                                                                                                           | 0 | 9 | 7 | 7 | 3 | 6 | 0 |
| <b>Janów<br/>Lubelski</b> | Local<br>Revitalisation<br>Programme<br>of the Janów<br>Lubelski<br>Municipality<br>for 2016–2022<br>(updated 2019) | 1. Reviving the Market Square as a chance for the development of local activity – "Old Market Square – the new heart of the city" (including the design of the Market Square as a multifunctional public space)                                                        |   |   | x | x |   |   |   |
|                           |                                                                                                                     | 2. Support for the activation and social integration of residents in the Revitalisation area (including activities aimed at increasing the activity and social integration of residents – creation of a meeting and activity space for non-governmental organisations) |   |   |   |   |   | x |   |
|                           |                                                                                                                     | 3. Development of support services in the area of revitalisation – "Social inclusion – Active inclusion is our chance" (among others, creation of a Daily Centre for Senior citizens Senior +)                                                                         |   |   |   |   |   | x |   |

|                  |                                                                            |                                                                                                                                                                                                                                                                                                              |   |   |   |   |   |   |   |
|------------------|----------------------------------------------------------------------------|--------------------------------------------------------------------------------------------------------------------------------------------------------------------------------------------------------------------------------------------------------------------------------------------------------------|---|---|---|---|---|---|---|
|                  |                                                                            | 4. Improving the safety of residents, the functionality of public spaces and the efficiency of energy management as a way to improve the quality of life of residents (including the expansion of Janów's surveillance system as an element of the local security system in the Janów Lubelski municipality) | x |   | x |   |   |   |   |
|                  |                                                                            | 5. Green public spaces as a space for the development of socio-cultural life and a showcase of the Town of Janów (among others, renovation of the water reservoir)                                                                                                                                           | x |   | x |   |   |   |   |
|                  |                                                                            | 6. Improvement of health services (Creating infrastructure for the implementation of long-term care tasks by the Independent Public Healthcare Centre (SP ZOZ) in Janów Lubelski)                                                                                                                            |   | x |   |   |   |   |   |
|                  |                                                                            | <b>Total</b>                                                                                                                                                                                                                                                                                                 | 2 | 1 | 3 | 1 | 0 | 2 | 0 |
| <b>Poniatowa</b> | Local Revitalisation Programme of the Poniatowa Municipality for 2017-2023 | 1. Revitalization of Poniatowa as a chance for the socio-economic revival of the Poniatowa municipality (among others, development of the public zone in the city centre, while taking into account its recreational function, development of tourism and recreational areas in the area of the city park)   |   | x | x |   |   |   |   |
|                  |                                                                            | 2. Creating a culture zone as an opportunity to increase the active participation of residents in cultural projects                                                                                                                                                                                          |   | x | x |   |   |   |   |
|                  |                                                                            | 3. Increasing the active participation of residents in cultural projects organised by the Centre for Culture, Promotion and Tourism in Poniatowa by modernising its facilities                                                                                                                               |   | x |   |   |   |   |   |
|                  |                                                                            | 4. Station Culture – development of the surroundings territorially and thematically related to the Vistula Narrow Gauge Railway                                                                                                                                                                              |   |   | x |   |   |   |   |
|                  |                                                                            | 5. Poniatowa – the Land of Clean Air                                                                                                                                                                                                                                                                         |   | x |   |   | x |   |   |
|                  |                                                                            | 6. Thermal modernization of public buildings in the municipality of Poniatowa                                                                                                                                                                                                                                |   | x |   |   |   |   |   |
|                  |                                                                            | 7. Station Culture                                                                                                                                                                                                                                                                                           |   | x |   |   |   |   |   |

|                |                                                         |                                                                                                                          |   |   |   |   |   |   |   |
|----------------|---------------------------------------------------------|--------------------------------------------------------------------------------------------------------------------------|---|---|---|---|---|---|---|
|                |                                                         | 8. Rehabilitation Centre                                                                                                 |   | x |   |   |   |   |   |
|                |                                                         | 9. Construction of facilities for tourism services                                                                       |   | x |   |   | x |   |   |
|                |                                                         | 10. Establishment of a Senior Citizens' Club in Poniatowa                                                                |   |   |   |   |   |   |   |
|                |                                                         | 11. Support for people with a history of cancer and preventive measures for the inhabitants of Poniatowa                 |   |   |   |   |   | x |   |
|                |                                                         | 12. A social cooperative as an opportunity to activate socially excluded people through work rather than demands         |   | x |   |   |   |   |   |
|                |                                                         | 13. Active inclusion of people at risk of social exclusion                                                               |   |   |   |   |   | x |   |
|                |                                                         | 14. Integration of the local communities through the implementation of cultural and educational projects in Poniatowa    |   |   |   |   |   | x |   |
|                |                                                         | 15. Increasing the active participation of senior citizens in social life                                                |   |   |   |   | x |   |   |
|                |                                                         | 16. Physical activity as a chance to heal the inhabitants of Poniatowa                                                   |   |   |   |   |   | x |   |
|                |                                                         | 17. From youth for the elders                                                                                            |   |   |   |   | x | x |   |
|                |                                                         | 18. Broadening the offer of institutions of culture and protecting the intangible cultural heritage of the Lublin region |   |   |   |   | x |   |   |
|                |                                                         | <b>Total</b>                                                                                                             | 0 | 9 | 3 | 0 | 5 | 5 | 0 |
| <b>Włodawa</b> | Włodawa<br>Revitalisation<br>Programme<br>for 2017–2023 | 1. "Mill on the River Bug" – a guest house                                                                               |   |   |   |   | x |   |   |
|                |                                                         | 2. Revitalisation of the historic Synagogue Complex in Włodawa                                                           |   |   | x |   |   |   |   |
|                |                                                         | 3. Multigenerational Recreation Club "From Juniors to Seniors"                                                           |   |   |   |   |   | x |   |
|                |                                                         | 4. Establishment of the County Social Services Centre                                                                    |   |   |   |   | x |   |   |
|                |                                                         | 5. Photography unites generations                                                                                        |   |   |   |   |   | x |   |
|                |                                                         | 6. Thermal modernisation of resources in 11 housing communities                                                          |   | x |   |   |   |   |   |
|                |                                                         | 7. Activation of clients of the Municipal Social Welfare Centre in Włodawa                                               |   |   |   |   |   | x |   |
|                |                                                         | 8. Municipal Security Surveillance Centre                                                                                |   |   | x |   |   |   |   |

|  |  |                                                                                                                  |   |   |   |   |   |   |   |
|--|--|------------------------------------------------------------------------------------------------------------------|---|---|---|---|---|---|---|
|  |  | 9. We want to be like everyone else... support for families struggling with a child's disability                 |   | x |   |   |   |   |   |
|  |  | 10. Creating new social, economic and recreational functionalities in the area of the Old Town Square in Włodawa |   |   | x |   |   |   |   |
|  |  | 11. Establishment of an Integrated Transportation Transfer Point                                                 |   | x |   |   |   |   |   |
|  |  | 12. Programme for pedestrian safety at crossings                                                                 |   |   | x |   |   |   |   |
|  |  | 13. Deep thermal modernisation of subsidised housing                                                             |   | x |   |   |   |   |   |
|  |  | 14. Włodawa Tourist Route – Promenade on the River Bug                                                           |   | x |   |   |   |   |   |
|  |  | 15. Włodawa – a city with energy – street lighting                                                               | x |   |   |   |   |   |   |
|  |  | <b>Total</b>                                                                                                     | 1 | 5 | 4 | 0 | 2 | 3 | 0 |

x – significant effects

Source: compiled by Author based on revitalisation programmes
